# Supplementary material for: Machine-learning-based analysis of influencing factors and synoptic patterns of foehn on the eastern foothills of the Taihang Mountains, China
Source: Copernicus journal article supplement (doi:10.5194/egusphere-2025-5439), 2026-01-29
Supplement: Supplementary file 1 [file egusphere-2025-5439-supplement.pdf]

Supplement

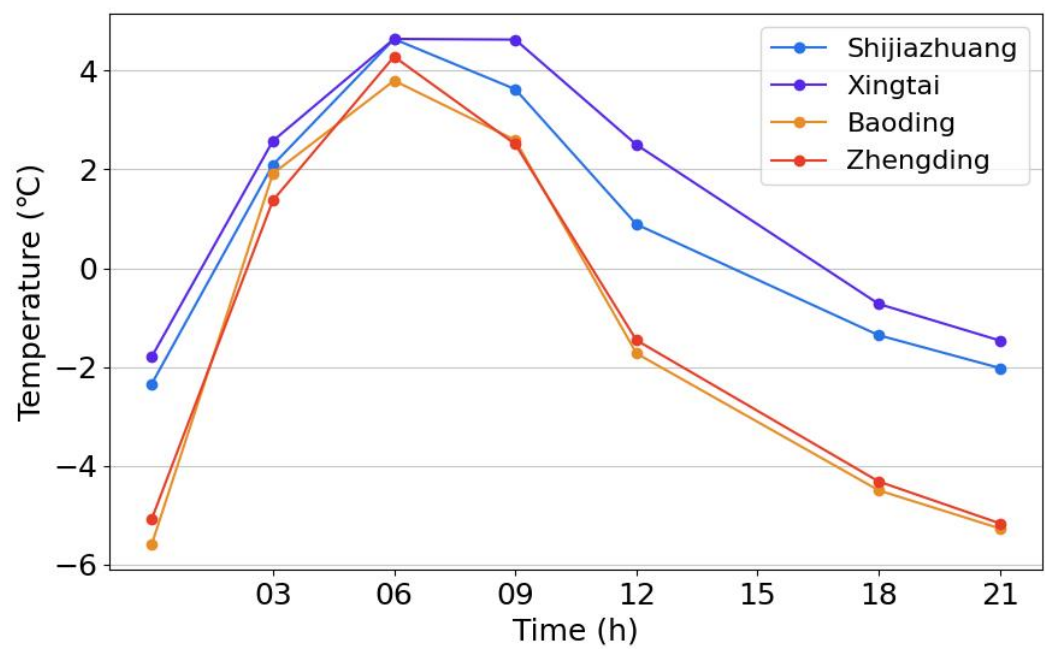

Figure S1: Winter daily-hour average comparison of 2m temperature among the leeward stations.

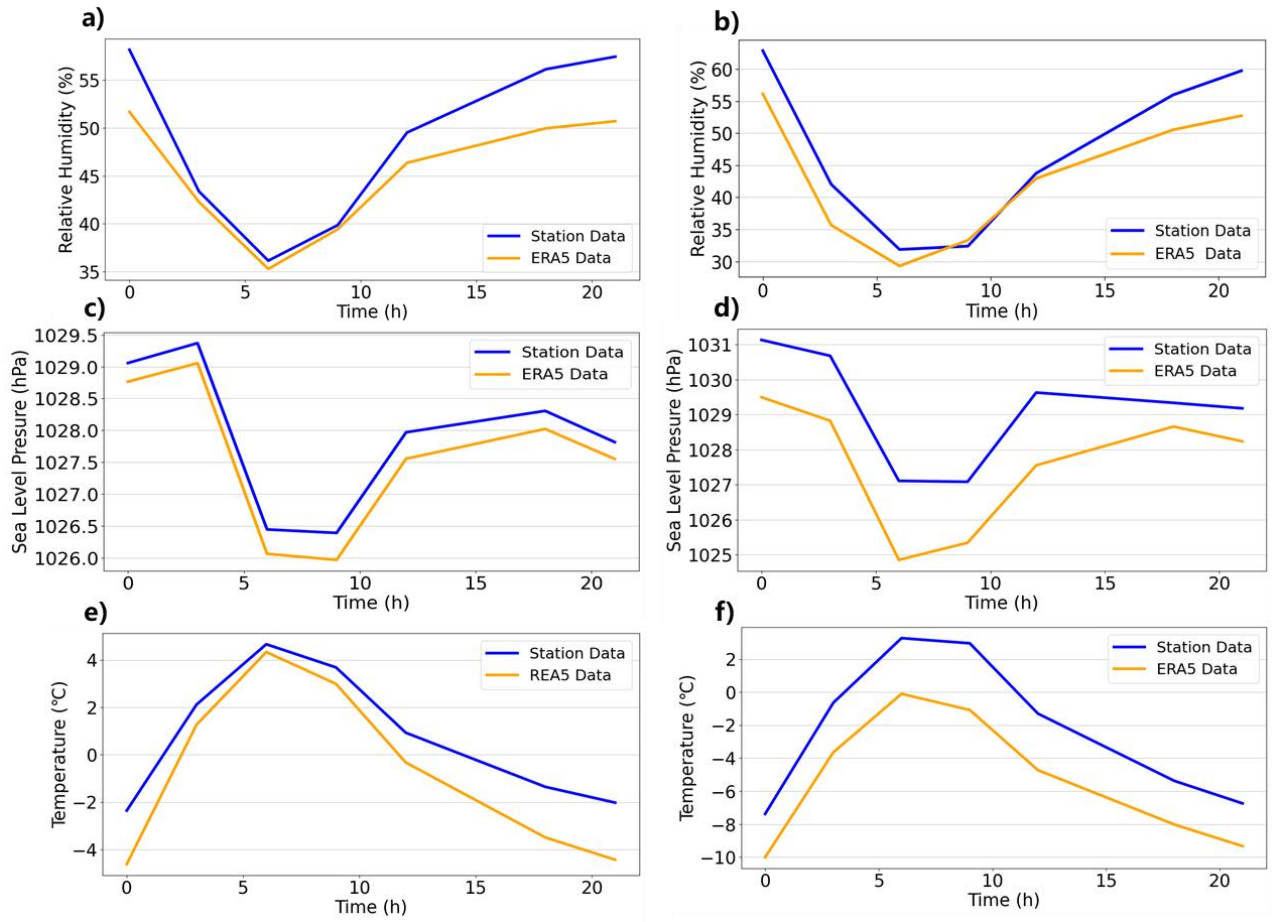

**Figure S2: Winter daily-hour average comparison of station data and ERA5 data. (a-b) Ground relative humidity. (c-d) Sea level pressure. (e-f) 2m temperature. The left column shows data for Shijiazhuang, and the right is for Taiyuan.**

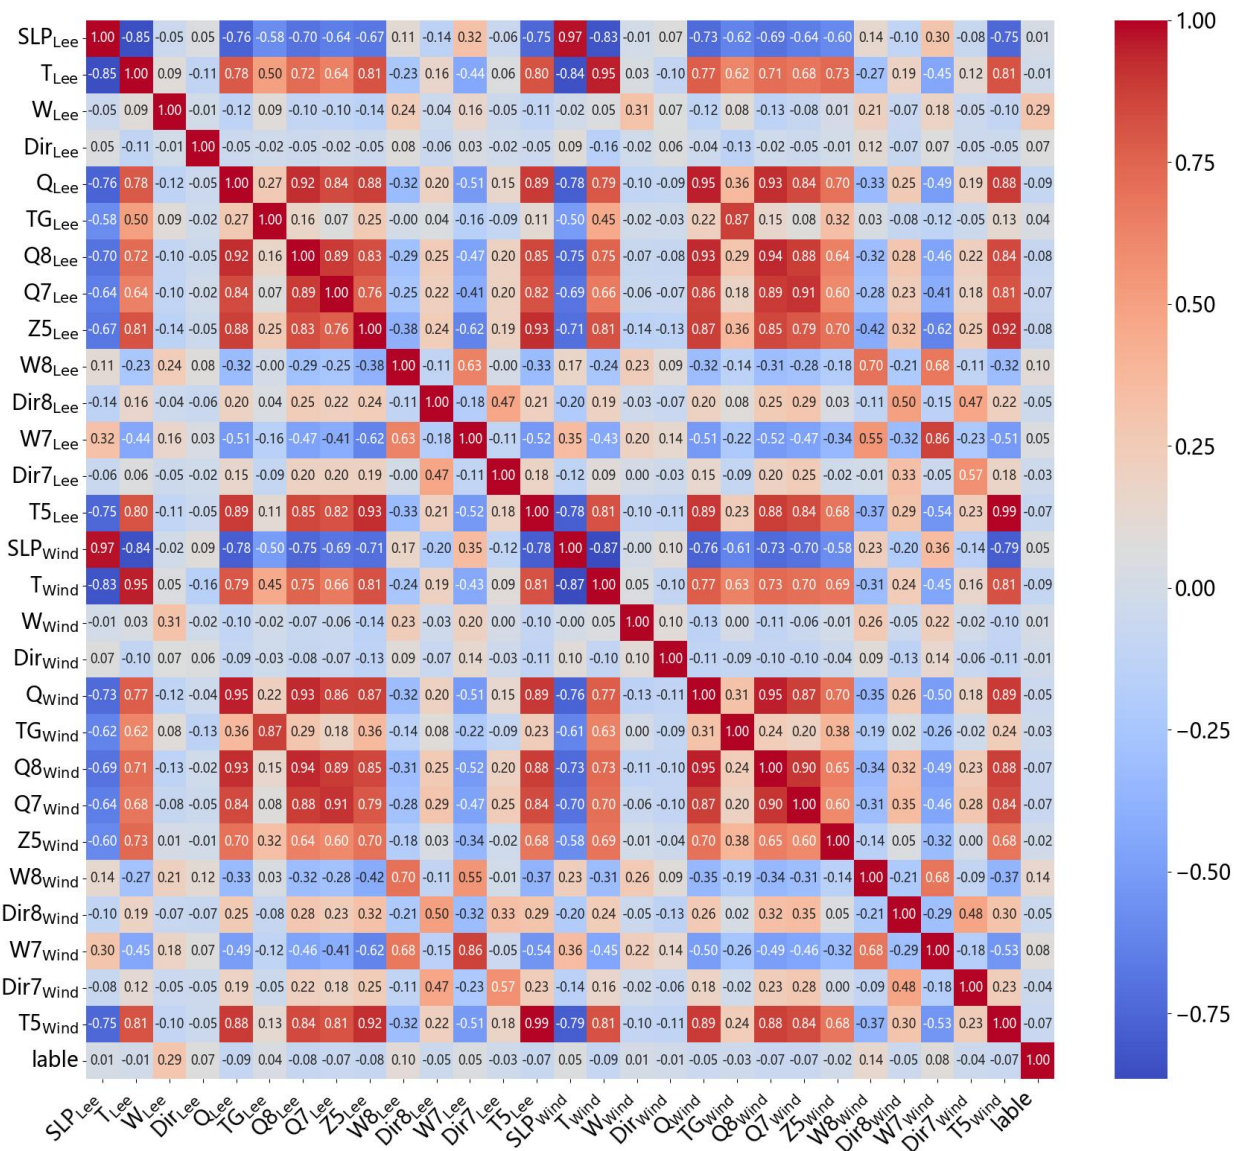

Figure S3: The Pearson correlation coefficient matrix of each factor.

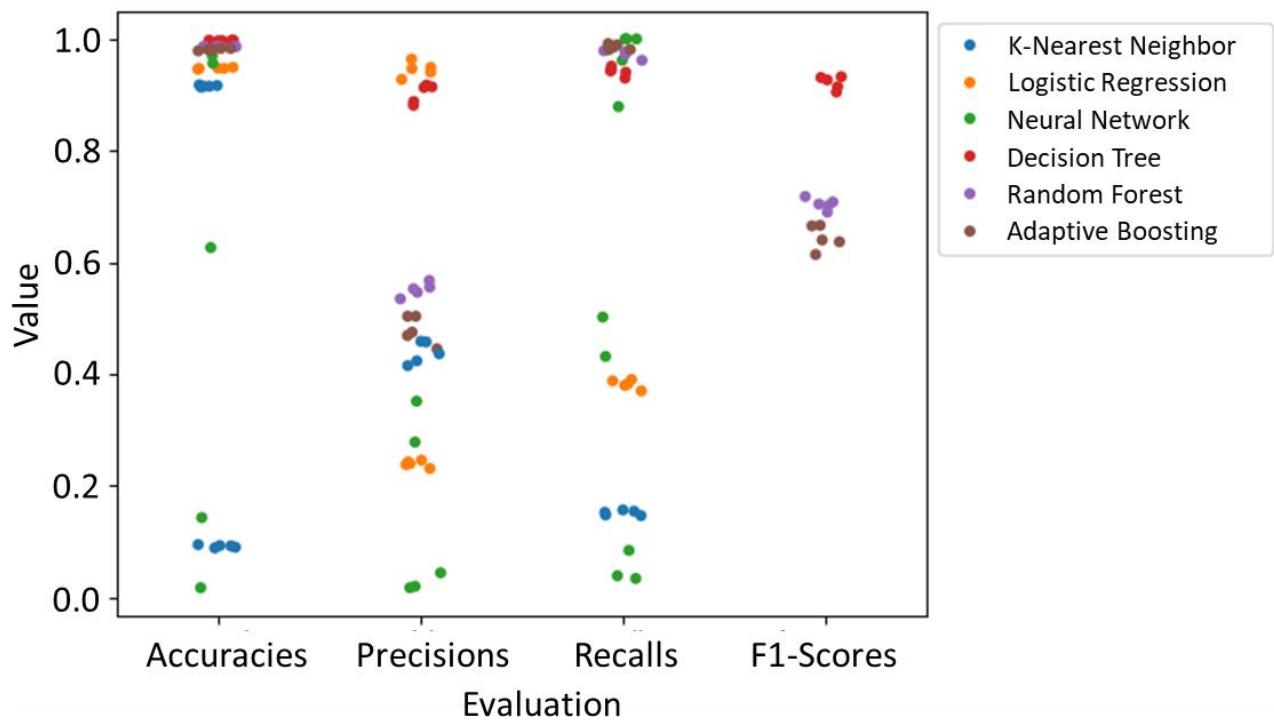

Figure S4: Scatter plots of each model's evaluation indicators. Each dot represents the result of one training session in k-fold cross-validation, and different colors represent different models.

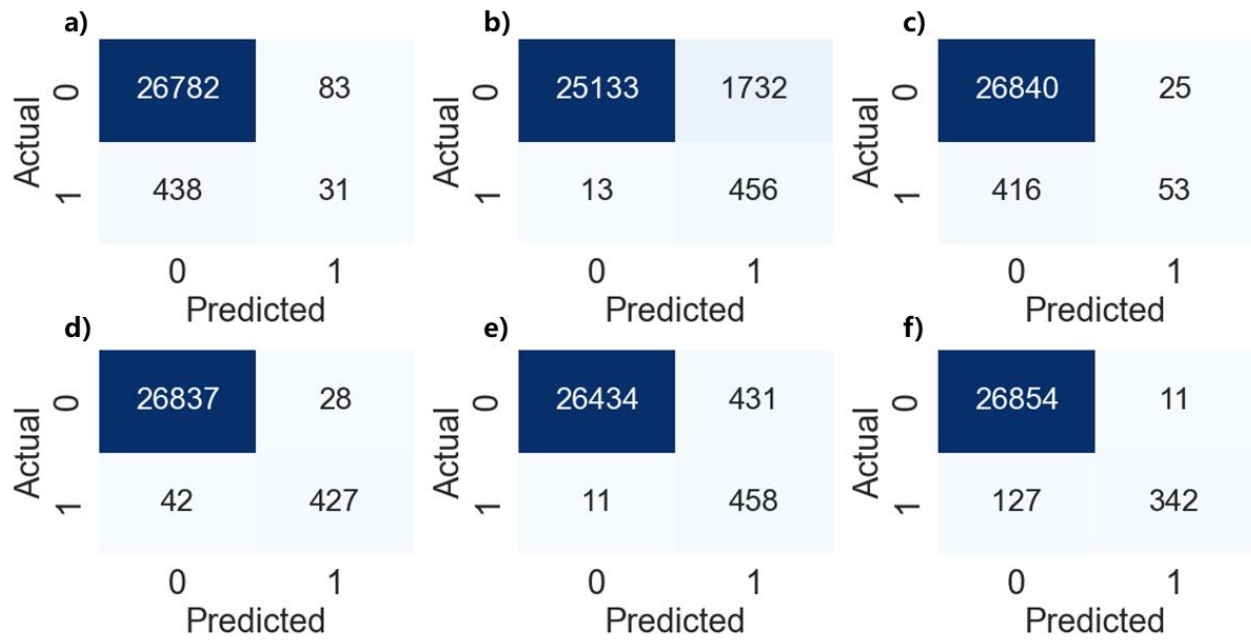

Figure S5: The confusion matrices of each model. (a-f) are K-Nearest Neighbor, Logistic Regression, Neural Network, Decision Tree, Random Forest and Adaptive Boosting respectively.

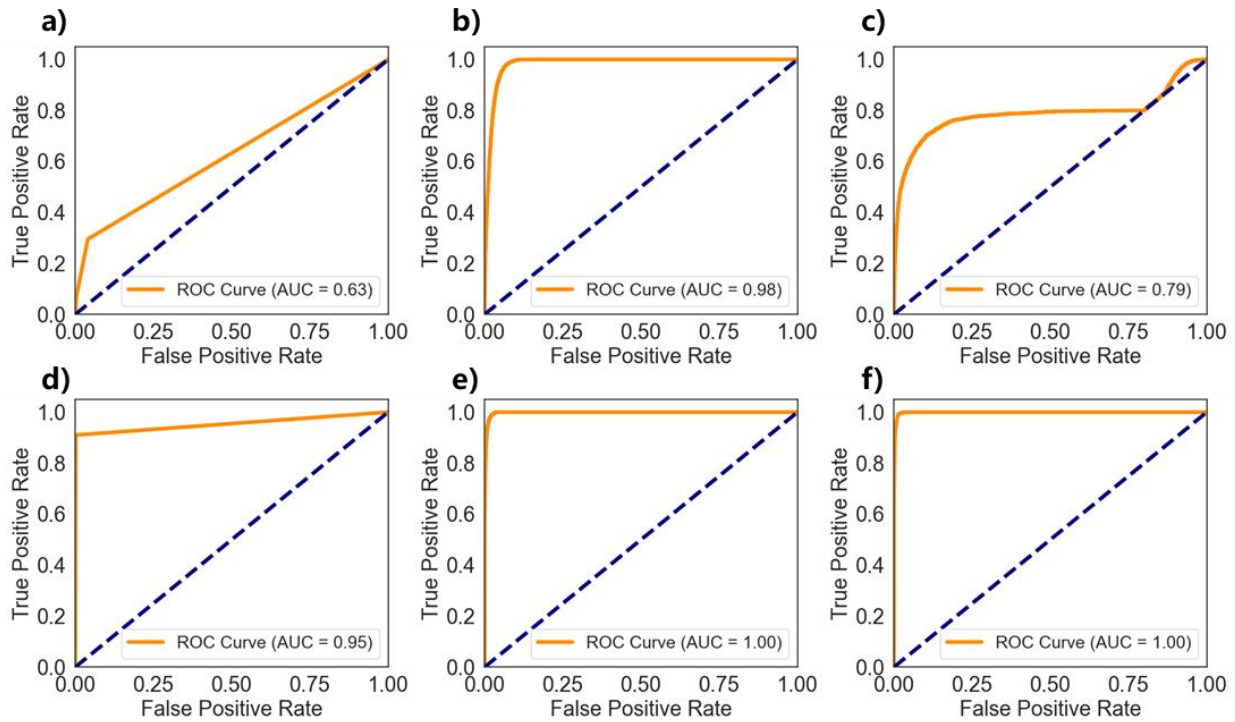

**Figure S6: The ROC curves and AUC of each model. (a-f) are K-Nearest Neighbor, Logistic Regression, Neural Network, Decision Tree, Random Forest and Adaptive Boosting respectively.**

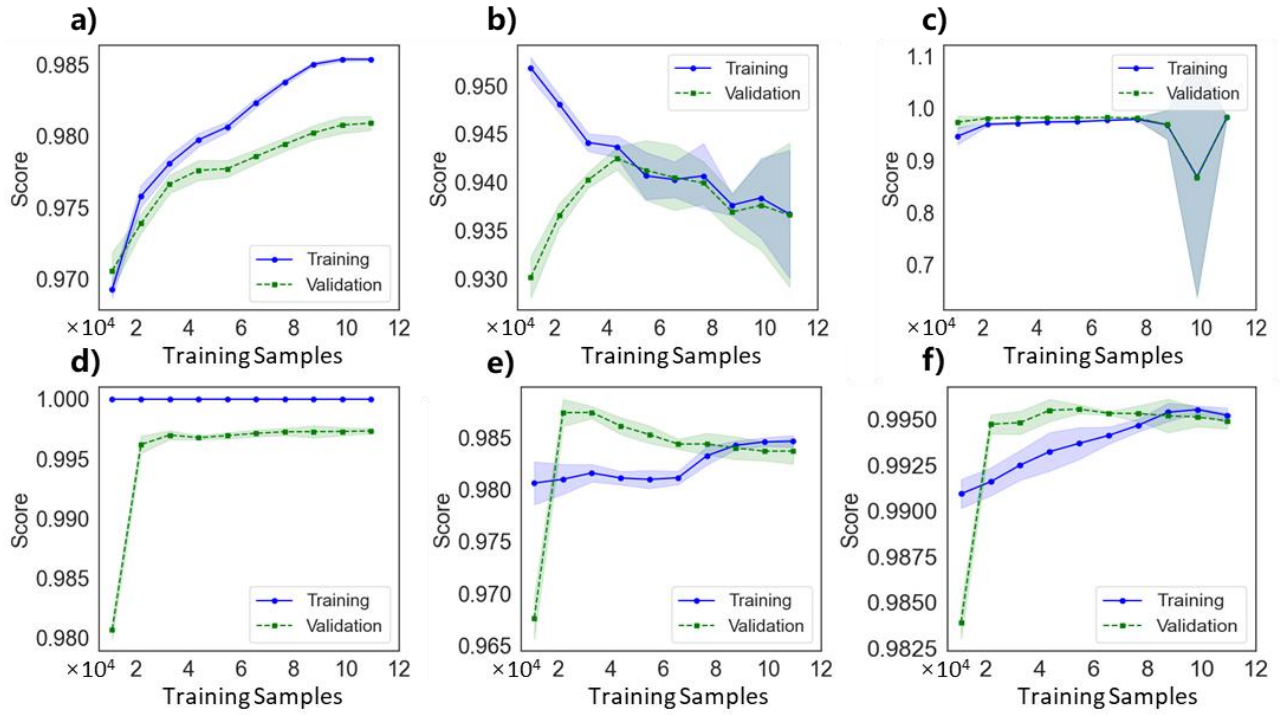

**Figure S7: The learning curves of each model. (a-f) are K-Nearest Neighbor, Logistic Regression, Neural Network, Decision Tree, Random Forest and Adaptive Boosting respectively.**

**Table S1: The threshold values and contributions of factors during the occurrence of foehn on the eastern foothills of the Taihang Mountains.**

| Factors     | All year                                                                               | Winter                 | Summer                | Contribution                                                                                                                      |
|-------------|----------------------------------------------------------------------------------------|------------------------|-----------------------|-----------------------------------------------------------------------------------------------------------------------------------|
| $W_{Lee}$   |                                                                                        | $> 3 \text{ m/s}$      |                       | Winter>Summer                                                                                                                     |
| $T_{Wind}$  | $< 3^{\circ}\text{C}$                                                                  | $< -6^{\circ}\text{C}$ | $< 9^{\circ}\text{C}$ | Winter<Summer                                                                                                                     |
| $T_{Lee}$   | \                                                                                      | \                      | \                     | Mainly based on the windward station.                                                                                             |
| $Q_{Wind}$  | $> 0.1 \text{ g/kg}$                                                                   | $> 0.07 \text{ g/kg}$  | $> 0.75 \text{ g/kg}$ | (It mainly has an inhibitory effect, and the inhibitory effect is not significant after reaching the threshold.)<br>Winter>Summer |
| $Q_{Lee}$   | \                                                                                      | \                      | \                     | Mainly based on the windward station.                                                                                             |
| $Dir_{Lee}$ | $203^{\circ} - 324^{\circ}$ (41%), where $237^{\circ} - 294^{\circ}$ contributes most. |                        |                       | \                                                                                                                                 |
